# Supplementary material
Source: HighWire-hosted journal article supplement (https://bmjopen.bmj.com/content/12/2/e047626)
Supplement: inline-supplementary-material-3 [file inline-supplementary-material-3.pdf]

## Appendix

## Supplementary tables

| Study no | Gender | Age years | Diagnosis             | Design workshop | User testing workshop 1 | User testing workshop 2 | User testing Workshop 3 | Evaluation workshop |
|----------|--------|-----------|-----------------------|-----------------|-------------------------|-------------------------|-------------------------|---------------------|
| 1        | Male   | 54        | Ca prostate           | Yes             | Yes                     | No                      | Yes                     | Yes                 |
| 2        | Male   | 66        | Melanoma              | Yes             | No                      | No                      | No                      | No                  |
| 3        | Female | 72        | Ca cervix             | Yes             | No                      | Yes                     | No                      | No                  |
| 4        | Female | 67        | Medullary ca          | Yes             | No                      | No                      | Yes                     | Yes                 |
| 5        | Female | 74        | Ca lung               | Yes             | Yes                     | No                      | No                      | Yes                 |
| 6        | Male   | 74        | Neuroendocrine tumour | Yes             | Yes                     | No                      | No                      | No                  |
| 7        | Male   | 69        | Ca prostate           | Yes             | No                      | Yes                     | Yes                     | Yes                 |
| 8        | Male   | 71        | Ca nasopharynx        | No              | No                      | Yes                     | No                      | No                  |
| 9        | Female | 51        | Ca thyroid            | No              | No                      | Yes                     | No                      | Yes                 |
| 10       | Female | 37        | Scq tongue            | No              | No                      | No                      | No                      | No                  |
| 11       | Female | 62        | Ca breast             | No              | No                      | No                      | Yes                     | No                  |

Supplementary table 1: Phase 1 participant demographic data

Supplementary Table 2: Missing data management

| Questionnaire       | Variable measured                      | Missing Data                                                             | Statistical test            |
|---------------------|----------------------------------------|--------------------------------------------------------------------------|-----------------------------|
| EQ-5D – 3D          | QoL                                    | No computation if values missing as single scores                        |                             |
| QLQ-C30             | QoL                                    | Values computed if < or = 10% data missing. Calculated mean for subscore |                             |
| DASS-21             | Depression, Anxiety, Stress            |                                                                          | Friedman (missing listwise) |
| AAQ II              | Psychological flexibility              |                                                                          | Friedman (missing listwise) |
| POMs                | Mood state                             |                                                                          | Friedman (missing listwise) |
| SCS                 | Self-compassion                        |                                                                          | Friedman (missing listwise) |
| WEBWBS/Ad WEMWBS    | Mental well-being                      |                                                                          | Friedman (missing listwise) |
| Locally developed Q | Self-compassion after intervention use |                                                                          | Friedman (missing listwise) |

**Supplementary Table 3: Descriptive Statistics Questionnaire Domain Scores**

| QUESTIONNAIRES & DOMAINS                       | N  | Mean   | Std. Dev. | Min    | Max    |
|------------------------------------------------|----|--------|-----------|--------|--------|
| <b>EQ-5D-5L</b>                                |    |        |           |        |        |
| <b>MOBILITY</b>                                |    |        |           |        |        |
| B_EQ5DM                                        | 12 | 1.33   | .49       | 1      | 2      |
| VR1_EQ5DM                                      | 12 | 1.33   | .49       | 1      | 2      |
| VR2_EQ5DM                                      | 12 | 1.33   | .49       | 1      | 2      |
| VR3_EQ5DM                                      | 12 | 1.33   | .49       | 1      | 2      |
| <b>SELF-CARE</b>                               |    |        |           |        |        |
| B_EQ5DSC                                       | 12 | 1.25   | .45       | 1      | 2      |
| VR1_EQ5DSC                                     | 12 | 1.25   | .45       | 1      | 2      |
| VR2_EQ5DSC                                     | 12 | 1.17   | .39       | 1      | 2      |
| VR3_EQ5DSC                                     | 12 | 1.17   | .39       | 1      | 2      |
| <b>USUAL ACTIVITIES</b>                        |    |        |           |        |        |
| B_EQ5DUA                                       | 12 | 1.58   | .52       | 1      | 2      |
| VR1_EQ5DUA                                     | 12 | 1.58   | .52       | 1      | 2      |
| VR2_EQ5DUA                                     | 12 | 1.42   | .52       | 1      | 2      |
| VR3_EQ5DUA                                     | 12 | 1.42   | .52       | 1      | 2      |
| <b>PAIN &amp; DISCOMFORT</b>                   |    |        |           |        |        |
| B_EQ5DPD                                       | 12 | 1.50   | .67       | 1      | 3      |
| VR1_EQ5DPD                                     | 12 | 1.58   | .67       | 1      | 3      |
| VR2_EQ5DPD                                     | 12 | 1.33   | .49       | 1      | 2      |
| VR3_EQ5DPD                                     | 12 | 1.67   | .65       | 1      | 3      |
| <b>ANXIETY &amp; DEPRESSION</b>                |    |        |           |        |        |
| B_EQ5DAD                                       | 12 | 1.42   | .52       | 1      | 2      |
| VR1_EQ5DAD                                     | 12 | 1.42   | .52       | 1      | 2      |
| VR2_EQ5DAD                                     | 12 | 1.42   | .52       | 1      | 2      |
| VR3_EQ5DAD                                     | 12 | 1.42   | .67       | 1      | 3      |
| <b>BAROMETER / VAS</b>                         |    |        |           |        |        |
| B_BAROMETER                                    | 12 | 71.83  | 15.30     | 50     | 100    |
| VR1_BAROMETER                                  | 12 | 71.00  | 15.09     | 50     | 100    |
| VR2_BAROMETER                                  | 12 | 72.17  | 16.68     | 40     | 100    |
| VR3_BAROMETER                                  | 12 | 67.50  | 20.62     | 29     | 100    |
| <b>QLQ C30 – EORTC QoL</b>                     |    |        |           |        |        |
| <b>GLOBAL HEALTH SCORE</b>                     |    |        |           |        |        |
| BQLQC30GHS                                     | 11 | -43.18 | 25.77     | -83.33 | -8.33  |
| VR1QLQC30GHS                                   | 11 | -43.94 | 22.39     | -83.33 | -8.33  |
| VR2QLQC30GHS                                   | 11 | -48.48 | 23.51     | -83.33 | -16.67 |
| VR3QLQC30GHS                                   | 11 | -48.48 | 23.81     | -83.33 | -16.67 |
| <b>FUNCTIONAL SCALE</b>                        |    |        |           |        |        |
| BQLQC30FS                                      | 11 | 7.07   | 24.05     | -42.22 | 33.33  |
| VR1QLQC30FS                                    | 11 | 4.44   | 23.83     | -42.22 | 33.33  |
| VR2QLQC30FS                                    | 11 | 7.47   | 24.10     | -44.44 | 33.33  |
| VR3QLQC30FS                                    | 11 | 7.27   | 24.93     | -46.67 | 33.33  |
| <b>SYMPTOM SCORE</b>                           |    |        |           |        |        |
| BQLQC30SS                                      | 11 | 10.02  | 21.13     | -35.90 | 30.77  |
| VR1QLQC30SS                                    | 11 | 8.39   | 20.13     | -35.90 | 30.77  |
| VR2QLQC30SS                                    | 11 | 10.26  | 21.54     | -43.59 | 33.33  |
| VRQLQC30SS                                     | 11 | 10.02  | 21.62     | -43.59 | 33.33  |
| <b>DASS21 – DEPRESSION, ANXIETY, STRESS 21</b> |    |        |           |        |        |
| <b>DEPRESSION</b>                              |    |        |           |        |        |
| BDASDEP                                        | 11 | 9.09   | 9.01      | 0      | 28     |
| VR1DASDEP                                      | 11 | 8.91   | 9.05      | 0      | 28     |
| VR2DASDEP                                      | 11 | 8.73   | 8.40      | 0      | 24     |

|                                                    |    |       |       |      |      |
|----------------------------------------------------|----|-------|-------|------|------|
| VR3DASDEP                                          | 11 | 6.91  | 7.34  | 0    | 18   |
| <b>ANXIETY</b>                                     |    |       |       |      |      |
| BDASANX                                            | 10 | 8.00  | 8.79  | 0    | 30   |
| VR1DASANX                                          | 10 | 6.60  | 5.82  | 0    | 16   |
| VR2DASANX                                          | 10 | 7.40  | 6.33  | 0    | 18   |
| VR3DASANX                                          | 10 | 4.60  | 3.53  | 0    | 10   |
| <b>STRESS</b>                                      |    |       |       |      |      |
| BDASSTRS                                           | 19 | 13.37 | 8.11  | 0    | 28   |
| BDASDEP                                            | 19 | 7.68  | 8.41  | 0    | 28   |
| BDASANX                                            | 18 | 7.89  | 7.62  | 0    | 30   |
| VR3DASSTRS                                         | 13 | 8.15  | 7.89  | 0    | 24   |
| VR3DASDEP                                          | 12 | 6.67  | 7.05  | 0    | 18   |
| VR3DASANX                                          | 11 | 4.36  | 3.44  | 0    | 10   |
| <b>AAQ – ACTION &amp; ACCEPTANCE QUESTIONNAIRE</b> |    |       |       |      |      |
| BTOTAAQ                                            | 12 | 18.75 | 9.30  | 7    | 41   |
| VR1TAAQ                                            | 12 | 19.25 | 8.85  | 7    | 39   |
| VR2TAAQ                                            | 12 | 21.08 | 10.80 | 7    | 43   |
| VR3TAAQ                                            | 12 | 18.08 | 9.06  | 7    | 39   |
| <b>POMS – PROFILE OF MOOD STATE</b>                |    |       |       |      |      |
| VR1PREPOM                                          | 19 | 20.42 | 5.79  | 12   | 36   |
| VR2PREPOMS                                         | 16 | 21.50 | 7.14  | 9    | 39   |
| VR3PREPOMS                                         | 13 | 23.62 | 6.97  | 17   | 36   |
| VR1POSTPOM                                         | 18 | 23.06 | 6.91  | 8    | 36   |
| VR2POSTPOM                                         | 13 | 22.38 | 4.25  | 16   | 31   |
| VR3POSTPOM                                         | 13 | 23.31 | 6.74  | 17   | 39   |
| <b>SCS – SELF-COMPASSION SCALE</b>                 |    |       |       |      |      |
| <b>SELF-KINDNESS</b>                               |    |       |       |      |      |
| BSCSSK                                             | 10 | 3.14  | .811  | 2.00 | 4.40 |
| VR1SCSSK                                           | 10 | 3.14  | .79   | 2.00 | 4.20 |
| VR2SCSSK                                           | 10 | 3.26  | .92   | 1.8  | 5.0  |
| VR3SCSSK                                           | 10 | 3.30  | 1.13  | 1.8  | 5.0  |
| <b>SELF-JUDGEMENT</b>                              |    |       |       |      |      |
| BSCSSJ                                             | 10 | 3.48  | 1.05  | 1.40 | 4.80 |
| VR1SCSSJ                                           | 10 | 3.48  | 1.05  | 1.40 | 4.80 |
| VR2SCSSJ                                           | 10 | 3.34  | 1.30  | 1.0  | 5.0  |
| VR3SCSSJ                                           | 10 | 3.50  | 1.14  | 1.6  | 5.0  |
| <b>COMMON HUMANITY</b>                             |    |       |       |      |      |
| BSCSCH                                             | 10 | 3.13  | .68   | 2.25 | 4.25 |
| VR1SCSCH                                           | 10 | 3.23  | .79   | 2.25 | 4.75 |
| VR2SCSCH                                           | 10 | 2.90  | 1.12  | 1.25 | 4.50 |
| VR3SCSCH                                           | 10 | 3.15  | 1.04  | 1.50 | 5.00 |
| <b>ISOLATION</b>                                   |    |       |       |      |      |
| BSCSISO                                            | 10 | 3.30  | 1.14  | 1.75 | 5.00 |
| VR1SCSISO                                          | 10 | 3.38  | 1.13  | 1.75 | 5.00 |
| VR2SCSISO                                          | 10 | 3.43  | 1.13  | 1.75 | 5.00 |
| VR3SCSISO                                          | 10 | 3.58  | 1.24  | 1.50 | 5.00 |
| <b>MINDFULNESS</b>                                 |    |       |       |      |      |
| BSCSM                                              | 10 | 4.10  | .74   | 3    | 5    |
| VR1SSCSM                                           | 10 | 4.05  | .64   | 2.75 | 5.00 |
| VR2SSCSM                                           | 10 | 3.73  | .76   | 2.75 | 5.00 |
| VR3SSCSM                                           | 10 | 3.75  | .82   | 2.75 | 5.00 |
| <b>OVER-IDENTIFIED</b>                             |    |       |       |      |      |
| BSCSOI                                             | 10 | 3.30  | 1.12  | 1.50 | 5.00 |
| VR1SCSOI                                           | 10 | 3.35  | 1.14  | 1.50 | 5.00 |
| VR2SCSOI                                           | 10 | 3.70  | 1.26  | 1.50 | 5.00 |

|                                                                   |    |       |       |      |      |
|-------------------------------------------------------------------|----|-------|-------|------|------|
| VR3SCSOI                                                          | 10 | 3.58  | 1.24  | 1.50 | 5.00 |
| <b>LDL – LOCALLY DEVELOPED QUESTIONS</b>                          |    |       |       |      |      |
| VR1LDQTS                                                          | 12 | 51.08 | 15.92 | 33   | 80   |
| VR2LDQTS                                                          | 12 | 50.67 | 14.75 | 36   | 77   |
| VR3LDQTS                                                          | 12 | 50.50 | 17.42 | 14   | 77   |
| <b>WEMWBS WARWICK-EDINBURGH MENTAL WELL-BEING SCALE</b>           |    |       |       |      |      |
| BWEMTS                                                            | 19 | 48.74 | 8.92  | 34   | 67   |
| VR1TWEWM                                                          | 19 | 48.58 | 9.17  | 34   | 67   |
| VR2WEMWTS                                                         | 15 | 48.13 | 9.48  | 37   | 70   |
| VR3WEMWTS                                                         | 13 | 49.46 | 10.44 | 39   | 70   |
| <b>AWEMWBS – ADAPTED WARWICK-EDINBURGH METAL WELL-BEING SCALE</b> |    |       |       |      |      |
| VR1TAWEM                                                          | 18 | 53.00 | 8.24  | 36   | 70   |
| 2AWEMTS                                                           | 14 | 54.43 | 12.64 | 37   | 85   |
| VR3AWEMTS                                                         | 13 | 52.69 | 8.98  | 39   | 70   |
| BWEMTS                                                            | 12 | 45.92 | 7.76  | 34   | 58   |
| VR1TAWEM                                                          | 12 | 51.67 | 8.66  | 36   | 70   |
| 2AWEMTS                                                           | 12 | 54.00 | 13.52 | 37   | 85   |
| VR3AWEMTS                                                         | 12 | 52.83 | 9.36  | 39   | 70   |

Supplementary table 4: Number of missing variables (number of participants)

| Measure                                                     | Baseline | VR1              | VR1               | VR2              | VR2               | VR3              | VR3               |
|-------------------------------------------------------------|----------|------------------|-------------------|------------------|-------------------|------------------|-------------------|
|                                                             |          | Pre intervention | Post intervention | Pre intervention | Post intervention | Pre intervention | Post intervention |
| EQ-5D                                                       | 0        | 0                | N/A               | 0                | N/A               | 0                | N/A               |
| QLQ C30                                                     | 0        | 0                | N/A               | 2(2)             | N/A               | 0                | N/A               |
| Action and Acceptance Questionnaire II - AAQII              | 0        | 0                | N/A               | 4(2)             | N/A               | 0                | N/A               |
| Depression, Anxiety and Stress Scale 21 – DASS21            | 7(3)     | 8(2)             | N/A               | 2(2)             | N/A               | 14(2)            | N/A               |
| Profile of Mood State - POMS                                | 6 (2)    | 8(3)             | 5(3)              | 9(3)             | 6(2)              | 1                | 2(2)              |
| Warwick Edinburgh Mental Well-being Scale - WEMWBS          | 1        | 2(1)             |                   | 0                | N/A               | 0                |                   |
| Self-compassion Scale - SCS                                 | 23 (1)   | 2(1)             | N/A               | 0                | N/A               | 0                | N/A               |
| Adapted Warwick Edinburgh Mental Well-being Scale - AWEMWBS | N/A      | N/A              | 0                 | N/A              | 0                 | N/A              | 1                 |
| Locally developed questionnaire                             | N/A      | N/A              | 0                 | N/A              | 1                 | N/A              | 0                 |

**Supplementary Table 5:** Multivariate analyses comparing baseline, VR1, VR2 and VR3 session scores

Friedman Test for EQ-5D-5L, QLQ C30 EORTC, DASS21, AAQ, SCS, LDQ, WEMWBS, AWEMWBS and Heart Rate Variation

| Ranks               |        |                     |        |                     |        |                     |        |
|---------------------|--------|---------------------|--------|---------------------|--------|---------------------|--------|
| Domain              | M Rank | Domain              | M Rank | Domain              | M Rank | Domain              | M Rank |
| B_EQ5DM             | 2.50   | B_EQ5DSC            | 2.58   | B_EQ5DUA            | 2.67   | B_EQ5DPD            | 2.46   |
| VR1_EQ5DM           | 2.50   | VR1_EQ5DSC          | 2.58   | VR1_EQ5DUA          | 2.67   | VR1_EQ5DPD          | 2.63   |
| VR2_EQ5DM           | 2.50   | VR2_EQ5DSC          | 2.42   | VR2_EQ5DUA          | 2.33   | VR2_EQ5DPD          | 2.13   |
| VR3_EQ5DM           | 2.50   | VR3_EQ5DSC          | 2.42   | VR3_EQ5DUA          | 2.33   | VR3_EQ5DPD          | 2.79   |
| <b>N</b>            | 12     | <b>N</b>            | 12     | <b>N</b>            | 12     | <b>N</b>            | 12     |
| <b>Chi-Square</b>   | .000   | <b>Chi-Square</b>   | 2.000  | <b>Chi-Square</b>   | 6.000  | <b>Chi-Square</b>   | 5.526  |
| <b>df</b>           | 3      | <b>df</b>           | 3      | <b>df</b>           | 3      | <b>df</b>           | 3      |
| <b>Asymp. Sign.</b> | 1.000  | <b>Asymp. Sign.</b> | .572   | <b>Asymp. Sign.</b> | .112   | <b>Asymp. Sign.</b> | .137   |
| Domain              | M Rank | Domain              | M Rank | Domain              | M Rank | Domain              | M Rank |
| B_EQ5DAD            | 2.50   | B_BAROMETER         | 2.63   | BQLQC30GHS          | 2.82   |                     |        |
| VR1_EQ5DAD          | 2.50   | VR1_BAROMETER       | 2.42   | VR1QLQC30GHS        | 2.82   |                     |        |
| VR2_EQ5DAD          | 2.50   | VR2_BAROMETER       | 2.67   | VR2QLQC30GHS        | 2.27   |                     |        |
| VR3_EQ5DAD          | 2.50   | VR3_BAROMETER       | 2.29   | VR3QLQC30GHS        | 2.09   |                     |        |
| <b>N</b>            | 12     | <b>N</b>            | 12     | <b>N</b>            | 11     |                     |        |
| <b>Chi-Square</b>   | .000   | <b>Chi-Square</b>   | .880   | <b>Chi-Square</b>   | 4.935  |                     |        |
| <b>df</b>           | 3      | <b>df</b>           | 3      | <b>df</b>           | 3      |                     |        |
| <b>Asymp. Sign.</b> | 1.000  | <b>Asymp. Sign.</b> | .830   | <b>Asymp. Sign.</b> | .177   |                     |        |
| Domain              | M Rank | Domain              | M Rank | Domain              | M Rank | Domain              | M Rank |
| BQLQC30FS           | 2.41   | BQLQC30SS           | 2.64   | BDASDEP             | 2.59   |                     |        |
| VR1QLQC30FS         | 2.18   | VR1QLQC30SS         | 2.00   | VR1DASDEP           | 2.45   |                     |        |
| VR2QLQC30FS         | 2.64   | VR2QLQC30SS         | 2.77   | VR2DASDEP           | 2.59   |                     |        |
| VR3QLQC30FS         | 2.77   | VR3QLQC30SS         | 2.59   | VR3DASDEP           | 2.36   |                     |        |
| <b>N</b>            | 11     | <b>N</b>            | 11     | <b>N</b>            | 11     |                     |        |
| <b>Chi-Square</b>   | 1.709  | <b>Chi-Square</b>   | 3.000  | <b>Chi-Square</b>   | .365   |                     |        |
| <b>df</b>           | 3      | <b>df</b>           | 3      | <b>df</b>           | 3      |                     |        |
| <b>Asymp. Sign.</b> | .635   | <b>Asymp. Sign.</b> | .392   | <b>Asymp. Sign.</b> | .947   |                     |        |
| Domain              | M Rank | Domain              | M Rank | Domain              | M Rank | Domain              | M Rank |
| BDASANX             | 2.75   | BDASSTRS            | 2.96   | BTOTAAQ             | 2.38   |                     |        |
| VR1DASANX           | 2.50   | VR1DASSTRS          | 2.92   | VR1TAAQ             | 2.63   |                     |        |
| VR2DASANX           | 2.80   | VR2DASSTRS          | 2.38   | VR2TAAQ             | 3.04   |                     |        |
| VR3DASANX           | 1.95   | VR3DASSTRS          | 1.75   | VR3TAAQ             | 1.96   |                     |        |
| <b>N</b>            | 10     | <b>N</b>            | 12     | <b>N</b>            | 12     |                     |        |
| <b>Chi-Square</b>   | 4.789  | <b>Chi-Square</b>   | 8.656  | <b>Chi-Square</b>   | 5.742  |                     |        |
| <b>df</b>           | 3      | <b>df</b>           | 3      | <b>df</b>           | 3      |                     |        |
| <b>Asymp. Sign.</b> | .188   | <b>Asymp. Sign.</b> | .034   | <b>Asymp. Sign.</b> | .125   |                     |        |
| Domain              | M Rank | Domain              | M Rank | Domain              | M Rank | Domain              | M Rank |
| BSCSSK              | 2.50   | BSCSSJ              | 2.25   | BSCSCH              | 2.25   |                     |        |
| VR1SCSSK            | 2.45   | VR1SCSSJ            | 2.25   | VR1SCSCH            | 2.65   |                     |        |
| VR2SCSSK            | 2.30   | VR2SCSSJ            | 2.60   | VR2SCSCH            | 2.40   |                     |        |
| VR3SCSSK            | 2.75   | VR3SCSSJ            | 2.90   | VR3SCSCH            | 2.70   |                     |        |
| <b>N</b>            | 10     | <b>N</b>            | 10     | <b>N</b>            | 10     |                     |        |
| <b>Chi-Square</b>   | .733   | <b>Chi-Square</b>   | 2.133  | <b>Chi-Square</b>   | .976   |                     |        |
| <b>df</b>           | 3      | <b>df</b>           | 3      | <b>df</b>           | 3      |                     |        |
| <b>Asymp. Sign.</b> | .866   | <b>Asymp. Sign.</b> | .545   | <b>Asymp. Sign.</b> | .807   |                     |        |
| Domain              | M Rank | Domain              | M Rank | Domain              | M Rank | Domain              | M Rank |
| BSCSISO             | 2.20   | BSCSM               | 2.90   | BSCSOI              | 2.05   |                     |        |

|                     |               |                     |               |                     |               |
|---------------------|---------------|---------------------|---------------|---------------------|---------------|
| VR1SCSISO           | 2.40          | VR1SSCSM            | 2.90          | VR1SCSOI            | 2.25          |
| VR2SCSISO           | 2.75          | VR2SSCSM            | 2.05          | VR2SCSOI            | 2.95          |
| VR3SCSISO           | 2.65          | VR3SSCSM            | 2.15          | VR3SCSOI            | 2.75          |
| <b>N</b>            | 10            | <b>N</b>            | 10            | <b>N</b>            | 10            |
| <b>Chi-Square</b>   | 2.018         | <b>Chi-Square</b>   | 5.230         | <b>Chi-Square</b>   | 4.417         |
| <b>df</b>           | 3             | <b>df</b>           | 3             | <b>df</b>           | 3             |
| <b>Asymp. Sign.</b> | .569          | <b>Asymp. Sign.</b> | .156          | <b>Asymp. Sign.</b> | .220          |
| <b>Domain</b>       | <b>M Rank</b> | <b>Domain</b>       | <b>M Rank</b> | <b>Domain</b>       | <b>M Rank</b> |
| VR1LDQTS            | 2.13          | BWEMTS              | 1.38          | VR1 HRV Pre         | 2.00          |
| VR2LDQTS            | 1.83          | VR1TAWEM            | 2.75          | VR1 HRV Mid         | 2.00          |
| VR3LDQTS            | 2.04          | 2AWEMTS             | 2.83          | VR1 HRV Post        | 2.00          |
| VR1LDQTS            | 2.13          | VR3AWEMTS           | 3.04          | VR1 HRV Pre         | 2.00          |
| <b>N</b>            | 12            | <b>N</b>            | 12            | <b>N</b>            | 3             |
| <b>Chi-Square</b>   | .565          | <b>Chi-Square</b>   | 12.905        | <b>Chi-Square</b>   | .000          |
| <b>df</b>           | 2             | <b>df</b>           | 3             | <b>df</b>           | 2             |
| <b>Asymp. Sign.</b> | .754          | <b>Asymp. Sign.</b> | .005          | <b>Asymp. Sign.</b> | 1.000         |
|                     |               |                     |               |                     |               |



**Supplementary Table 6:** Multi-variate analyses comparing baseline to VR3 session scores

Wilcoxon Signed Ranks Test for DASS21, AAQ, WEMWBS &amp; AWEMWBS, POMS and SSC

| DASS21                        |                        | N                       | Mean Rank               | Sum of Ranks |
|-------------------------------|------------------------|-------------------------|-------------------------|--------------|
| VR3DASSTRS - BDASSTRS         | Negative Ranks         | 9 <sup>a</sup>          | 6.33                    | 57.00        |
|                               | Positive Ranks         | 2 <sup>b</sup>          | 4.50                    | 9.00         |
|                               | Ties                   | 2 <sup>c</sup>          |                         |              |
|                               | Total                  | 13                      |                         |              |
| VR3DASDEP - BDASDEP           | Negative Ranks         | 5 <sup>d</sup>          | 5.20                    | 26.00        |
|                               | Positive Ranks         | 4 <sup>e</sup>          | 4.75                    | 19.00        |
|                               | Ties                   | 3 <sup>f</sup>          |                         |              |
|                               | Total                  | 12                      |                         |              |
| VR3DASANX - BDASANX           | Negative Ranks         | 5 <sup>g</sup>          | 3.00                    | 15.00        |
|                               | Positive Ranks         | 0 <sup>h</sup>          | .00                     | .00          |
|                               | Ties                   | 6 <sup>i</sup>          |                         |              |
|                               | Total                  | 11                      |                         |              |
| <b>Test statistics</b>        |                        |                         |                         |              |
|                               | VR3DASSTRS - BDASSTRS  | VR3DASDEP - BDASDEP     | VR3DASANX - BDASANX     |              |
| <b>Z</b>                      | -2.138 <sup>b</sup>    | -.418 <sup>b</sup>      | -2.032 <sup>b</sup>     |              |
| <b>Asymp. Sig. (2-tailed)</b> | .033                   | .676                    | .042                    |              |
| <b>AAQ</b>                    |                        |                         |                         |              |
|                               |                        | N                       | Mean Rank               | Sum of Ranks |
| VR1POSTPOM - VR1PREPOM        | Negative Ranks         | 2 <sup>a</sup>          | 7.50                    | 15.00        |
|                               | Positive Ranks         | 11 <sup>b</sup>         | 6.91                    | 76.00        |
|                               | Ties                   | 5 <sup>c</sup>          |                         |              |
|                               | Total                  | 18                      |                         |              |
| VR2POSTPOM - VR2PREPOMS       | Negative Ranks         | 6 <sup>d</sup>          | 4.17                    | 25.00        |
|                               | Positive Ranks         | 4 <sup>e</sup>          | 7.50                    | 30.00        |
|                               | Ties                   | 3 <sup>f</sup>          |                         |              |
|                               | Total                  | 13                      |                         |              |
| VR3POSTPOM - VR3PREPOMS       | Negative Ranks         | 4 <sup>g</sup>          | 3.00                    | 12.00        |
|                               | Positive Ranks         | 2 <sup>h</sup>          | 4.50                    | 9.00         |
|                               | Ties                   | 7 <sup>i</sup>          |                         |              |
|                               | Total                  | 13                      |                         |              |
| <b>Test statistics</b>        |                        |                         |                         |              |
|                               | VR1POSTPOM - VR1PREPOM | VR2POSTPOM - VR2PREPOMS | VR3POSTPOM - VR3PREPOMS |              |
| <b>Z</b>                      | -2.136 <sup>b</sup>    | -.255 <sup>b</sup>      | -.315 <sup>c</sup>      |              |
| <b>Asymp. Sig. (2-tailed)</b> | .033                   | .799                    | .752                    |              |
| <b>WEMWBS &amp; AWEMWBS</b>   |                        |                         |                         |              |
|                               |                        | N                       | Mean Rank               | Sum of Ranks |
| VR1TAWEM - VR1TWEWM           | Negative Ranks         | 2 <sup>d</sup>          | 5.00                    | 10.00        |
|                               | Positive Ranks         | 13 <sup>e</sup>         | 8.46                    | 110.00       |
|                               | Ties                   | 3 <sup>f</sup>          |                         |              |
|                               | Total                  | 18                      |                         |              |
| 2AWEMTS - VR2WEMWTS           | Negative Ranks         | 2 <sup>g</sup>          | 1.50                    | 3.00         |
|                               | Positive Ranks         | 8 <sup>h</sup>          | 6.50                    | 52.00        |

|                                |                        |                     |                         |                     |                         |                     |
|--------------------------------|------------------------|---------------------|-------------------------|---------------------|-------------------------|---------------------|
|                                | Ties                   |                     | 4 <sup>i</sup>          |                     |                         |                     |
|                                | Total                  |                     | 14                      |                     |                         |                     |
| <b>VR3AWEMTS - VR3WEMWTS</b>   | Negative Ranks         |                     | 1 <sup>j</sup>          | 1.50                | 1.50                    |                     |
|                                | Positive Ranks         |                     | 8 <sup>k</sup>          | 5.44                | 43.50                   |                     |
|                                | Ties                   |                     | 4 <sup>l</sup>          |                     |                         |                     |
|                                | Total                  |                     | 13                      |                     |                         |                     |
| <b>Test statistics</b>         |                        |                     |                         |                     |                         |                     |
|                                | VR1TAWEM - VR1TWEWM    |                     | 2AWEMTS - VR2WEMWTS     |                     | VR3AWEMTS - VR3WEMWTS   |                     |
| <b>Z</b>                       |                        | -2.846 <sup>b</sup> |                         | -2.501 <sup>b</sup> |                         | -2.492 <sup>b</sup> |
| <b>Asymp. Sig. (2-tailed)</b>  |                        | .004                |                         | .012                |                         | .013                |
|                                |                        |                     |                         |                     |                         |                     |
| <b>POMS</b>                    |                        |                     | <b>N</b>                | <b>Mean Rank</b>    | <b>Sum of Ranks</b>     |                     |
| <b>VR1POSTPOM - VR1PREPOM</b>  | Negative Ranks         |                     | 2 <sup>a</sup>          | 7.50                | 15.00                   |                     |
|                                | Positive Ranks         |                     | 11 <sup>b</sup>         | 6.91                | 76.00                   |                     |
|                                | Ties                   |                     | 5 <sup>c</sup>          |                     |                         |                     |
|                                | Total                  |                     | 18                      |                     |                         |                     |
| <b>VR2POSTPOM - VR2PREPOMS</b> | Negative Ranks         |                     | 6 <sup>d</sup>          | 4.17                | 25.00                   |                     |
|                                | Positive Ranks         |                     | 4 <sup>e</sup>          | 7.50                | 30.00                   |                     |
|                                | Ties                   |                     | 3 <sup>f</sup>          |                     |                         |                     |
|                                | Total                  |                     | 13                      |                     |                         |                     |
| <b>VR3POSTPOM - VR3PREPOMS</b> | Negative Ranks         |                     | 4 <sup>g</sup>          | 3.00                | 12.00                   |                     |
|                                | Positive Ranks         |                     | 2 <sup>h</sup>          | 4.50                | 9.00                    |                     |
|                                | Ties                   |                     | 7 <sup>i</sup>          |                     |                         |                     |
|                                | Total                  |                     | 13                      |                     |                         |                     |
| <b>Test statistics</b>         |                        |                     |                         |                     |                         |                     |
|                                | VR1POSTPOM - VR1PREPOM |                     | VR2POSTPOM - VR2PREPOMS |                     | VR3POSTPOM - VR3PREPOMS |                     |
| <b>Z</b>                       |                        | -2.136 <sup>b</sup> |                         | -.255 <sup>b</sup>  |                         | -.315 <sup>c</sup>  |
| <b>Asymp. Sig. (2-tailed)</b>  |                        | .033                |                         | .799                |                         | .752                |
|                                |                        |                     |                         |                     |                         |                     |
|                                |                        |                     |                         |                     |                         |                     |
| <b>SSC</b>                     | VR3SCSSK - BSCSSK      | VR3SCSSJ - BSCSSJ   | VR3SCSCH - BSCSCH       | VR3SCSISO - BSCSISO | VR3SSCSM - BSCSM        | VR3SCSOI - BSCSOI   |
| <b>Z</b>                       |                        | -1.011 <sup>b</sup> |                         | -.978 <sup>b</sup>  |                         | -.224 <sup>c</sup>  |
| <b>Asymp. Sig. (2-tailed)</b>  |                        | .312                |                         | .328                |                         | .823                |
|                                |                        |                     |                         | .207                |                         | .108                |
|                                |                        |                     |                         |                     |                         | .153                |

**Supplementary Tables 6a & 6b:** Multi-variate analyses comparing VR session scores

ANOVA for Electrodermal Activity (EDA) and Heart Rate

**Supplementary Table 6a** Physiology Data – Electrodermal Activity (EDA) – VR 1 – Pre/Mid/Post**DESCRIPTIVE STATISTICS**

|                                         | Mean               | Std. Deviation          | N     |             |        |      |                     |
|-----------------------------------------|--------------------|-------------------------|-------|-------------|--------|------|---------------------|
| <b>VR1 EDA PRE</b>                      | 11.50              | 3.416                   | 4     |             |        |      |                     |
| <b>VR1 EDA MID</b>                      | 8.75               | 2.217                   | 4     |             |        |      |                     |
| <b>VR1 EDA POST</b>                     | 8.25               | 2.062                   | 4     |             |        |      |                     |
| <b>TESTS OF WITHIN-SUBJECTS EFFECTS</b> |                    |                         |       |             |        |      |                     |
|                                         |                    |                         |       |             |        |      |                     |
| <b>SOURCE</b>                           |                    | Type III Sum of Squares | df    | Mean Square | F      | Sig. | Partial Eta Squared |
| <b>EDA1</b>                             | Sphericity Assumed | 24.500                  | 2     | 12.250      | 13.364 | .006 | .817                |
|                                         | Greenhouse-Geisser | 24.500                  | 1.658 | 14.781      | 13.364 | .011 | .817                |
|                                         | Huynh-Feldt        | 24.500                  | 2.000 | 12.250      | 13.364 | .006 | .817                |
|                                         | Lower-bound        | 24.500                  | 1.000 | 24.500      | 13.364 | .035 | .817                |
| <b>ERROR(EDA1)</b>                      | Sphericity Assumed | 5.500                   | 6     | .917        |        |      |                     |
|                                         | Greenhouse-Geisser | 5.500                   | 4.973 | 1.106       |        |      |                     |
|                                         | Huynh-Feldt        | 5.500                   | 6.000 | .917        |        |      |                     |
|                                         | Lower-bound        | 5.500                   | 3.000 | 1.833       |        |      |                     |

**Supplementary Table 6b** Physiology Data – Heart Rate – VR 2 – Pre/Mid/Post

| Descriptive Statistics           |                    |                         |       |             |        |      |                     |
|----------------------------------|--------------------|-------------------------|-------|-------------|--------|------|---------------------|
|                                  | Mean               | Std. Deviation          | N     |             |        |      |                     |
| VR2 HR Pre                       | 75.75              | 6.185                   | 4     |             |        |      |                     |
| VR2 HR Mid                       | 73.75              | 6.850                   | 4     |             |        |      |                     |
| VR2 HR Post                      | 75.00              | 6.683                   | 4     |             |        |      |                     |
| Tests of Within-Subjects Effects |                    |                         |       |             |        |      |                     |
| Source                           |                    | Type III Sum of Squares | df    | Mean Square | F      | Sig. | Partial Eta Squared |
| HR2                              | Sphericity Assumed | 8.167                   | 2     | 4.083       | 13.364 | .006 | .817                |
|                                  | Greenhouse-Geisser | 8.167                   | 1.424 | 5.737       | 13.364 | .017 | .817                |
|                                  | Huynh-Feldt        | 8.167                   | 2.000 | 4.083       | 13.364 | .006 | .817                |
|                                  | Lower-bound        | 8.167                   | 1.000 | 8.167       | 13.364 | .035 | .817                |
| Error(HR2)                       | Sphericity Assumed | 1.833                   | 6     | .306        |        |      |                     |
|                                  | Greenhouse-Geisser | 1.833                   | 4.271 | .429        |        |      |                     |
|                                  | Huynh-Feldt        | 1.833                   | 6.000 | .306        |        |      |                     |
|                                  | Lower-bound        | 1.833                   | 3.000 | .611        |        |      |                     |
